# Supplementary material
Source: publisher figshare collection journal article supplement (https://tandf.figshare.com/articles/dataset/_/12312101)

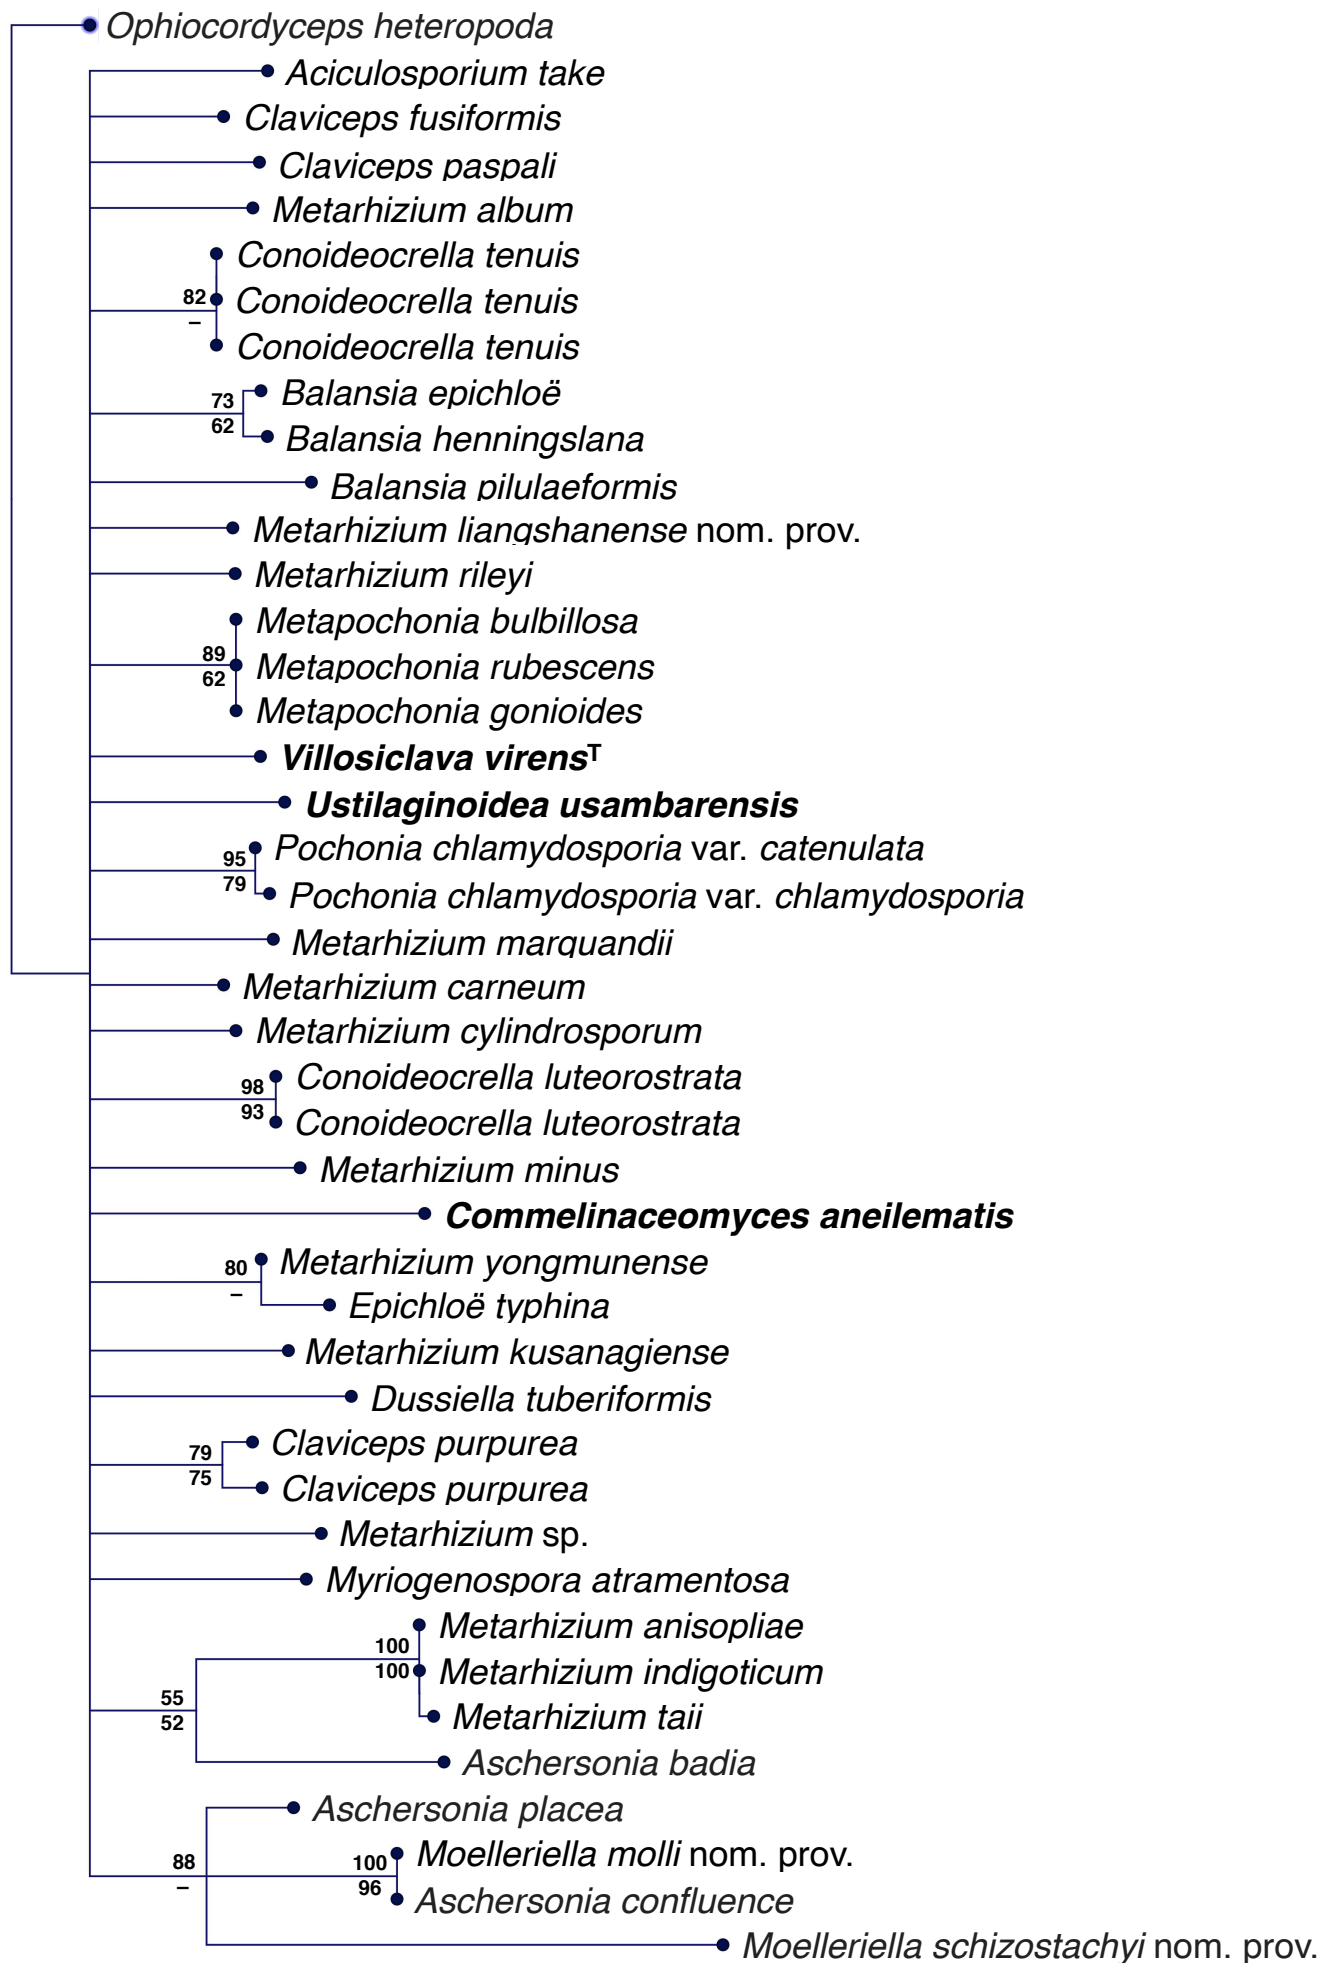

0.005

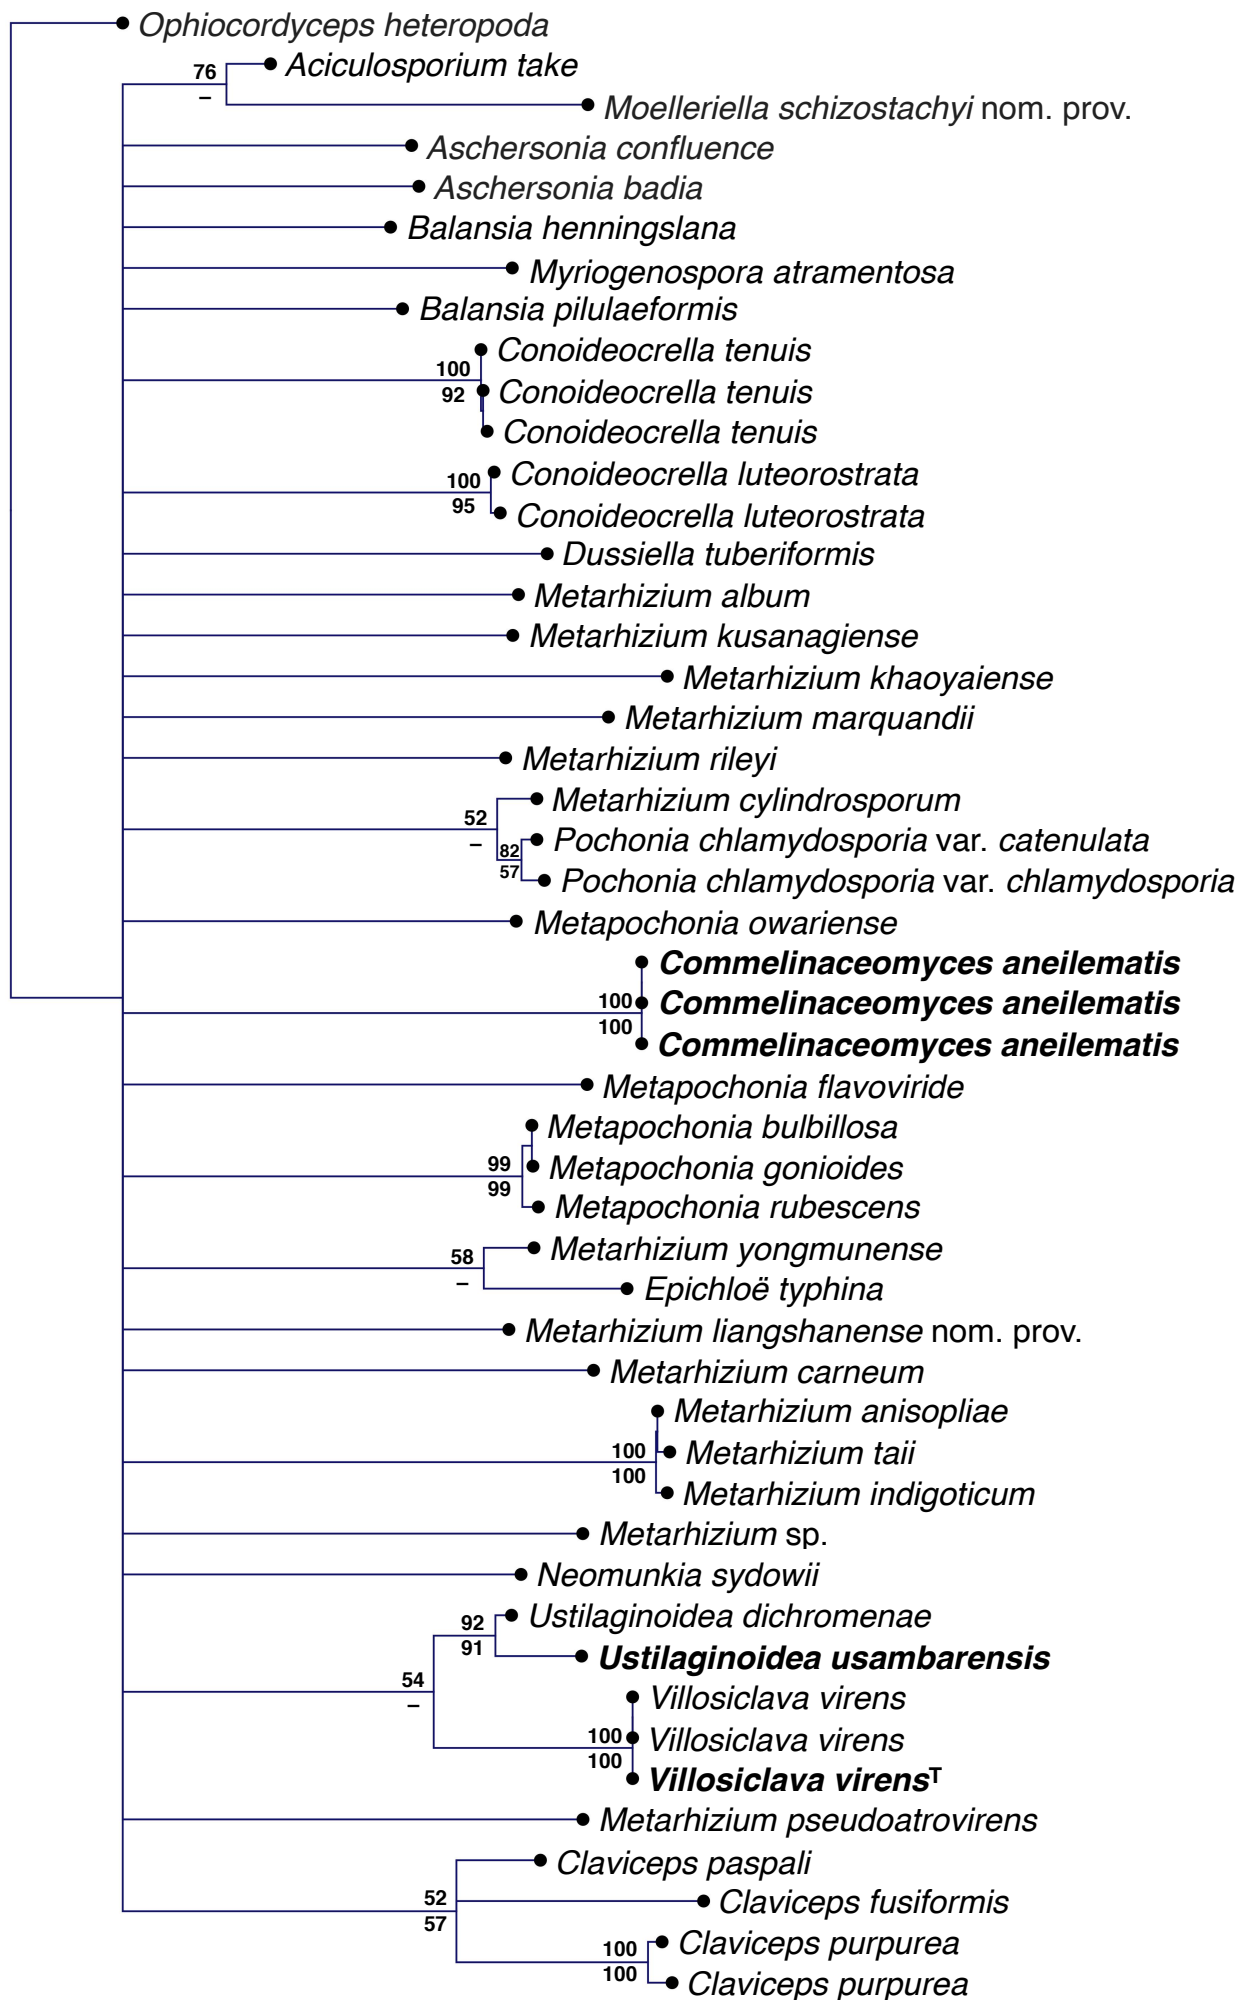

0.006

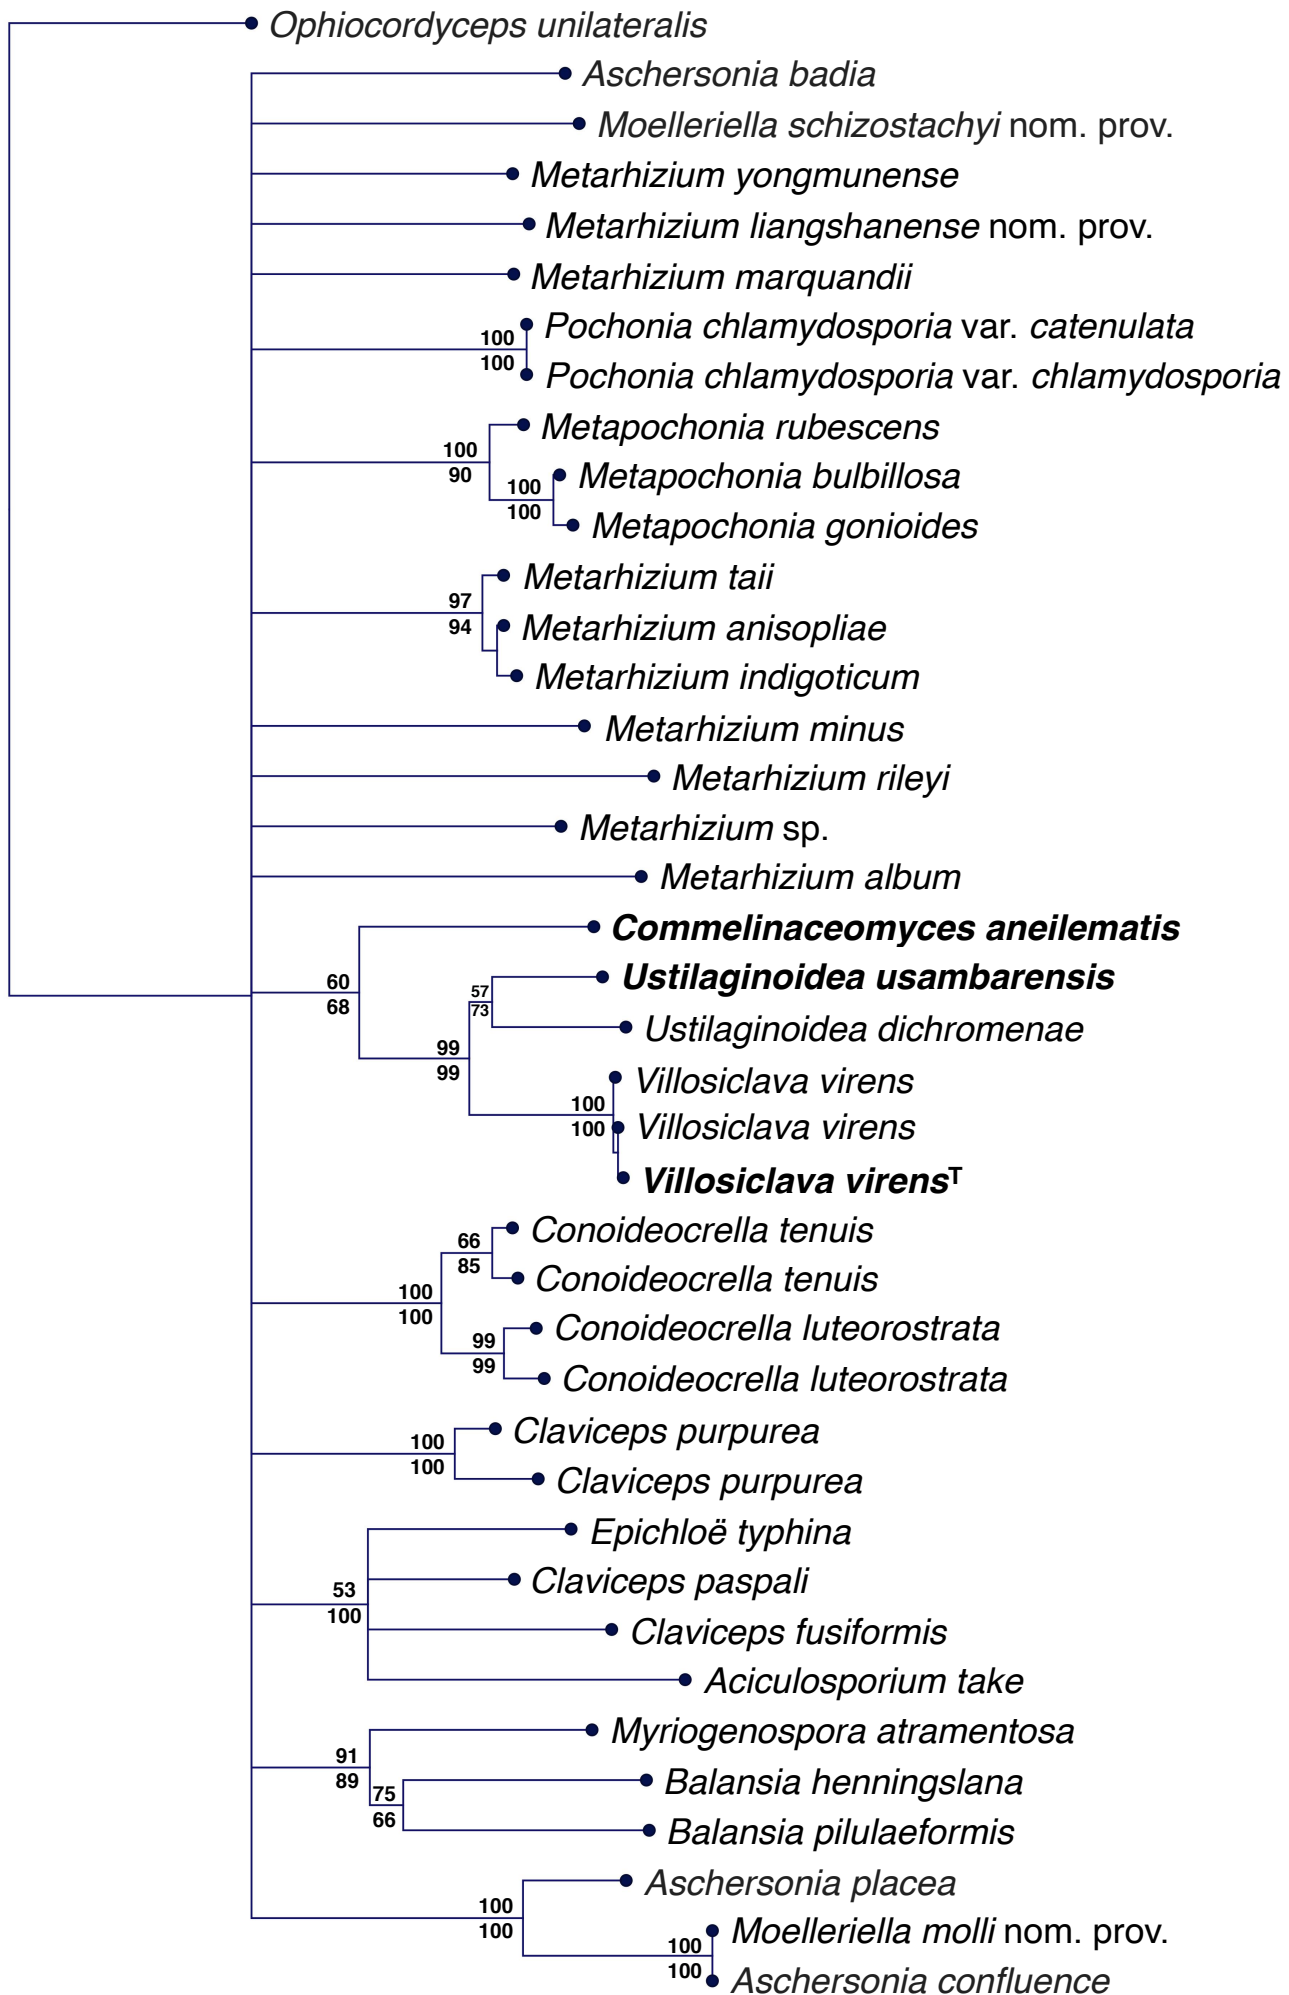

0.008

TEF

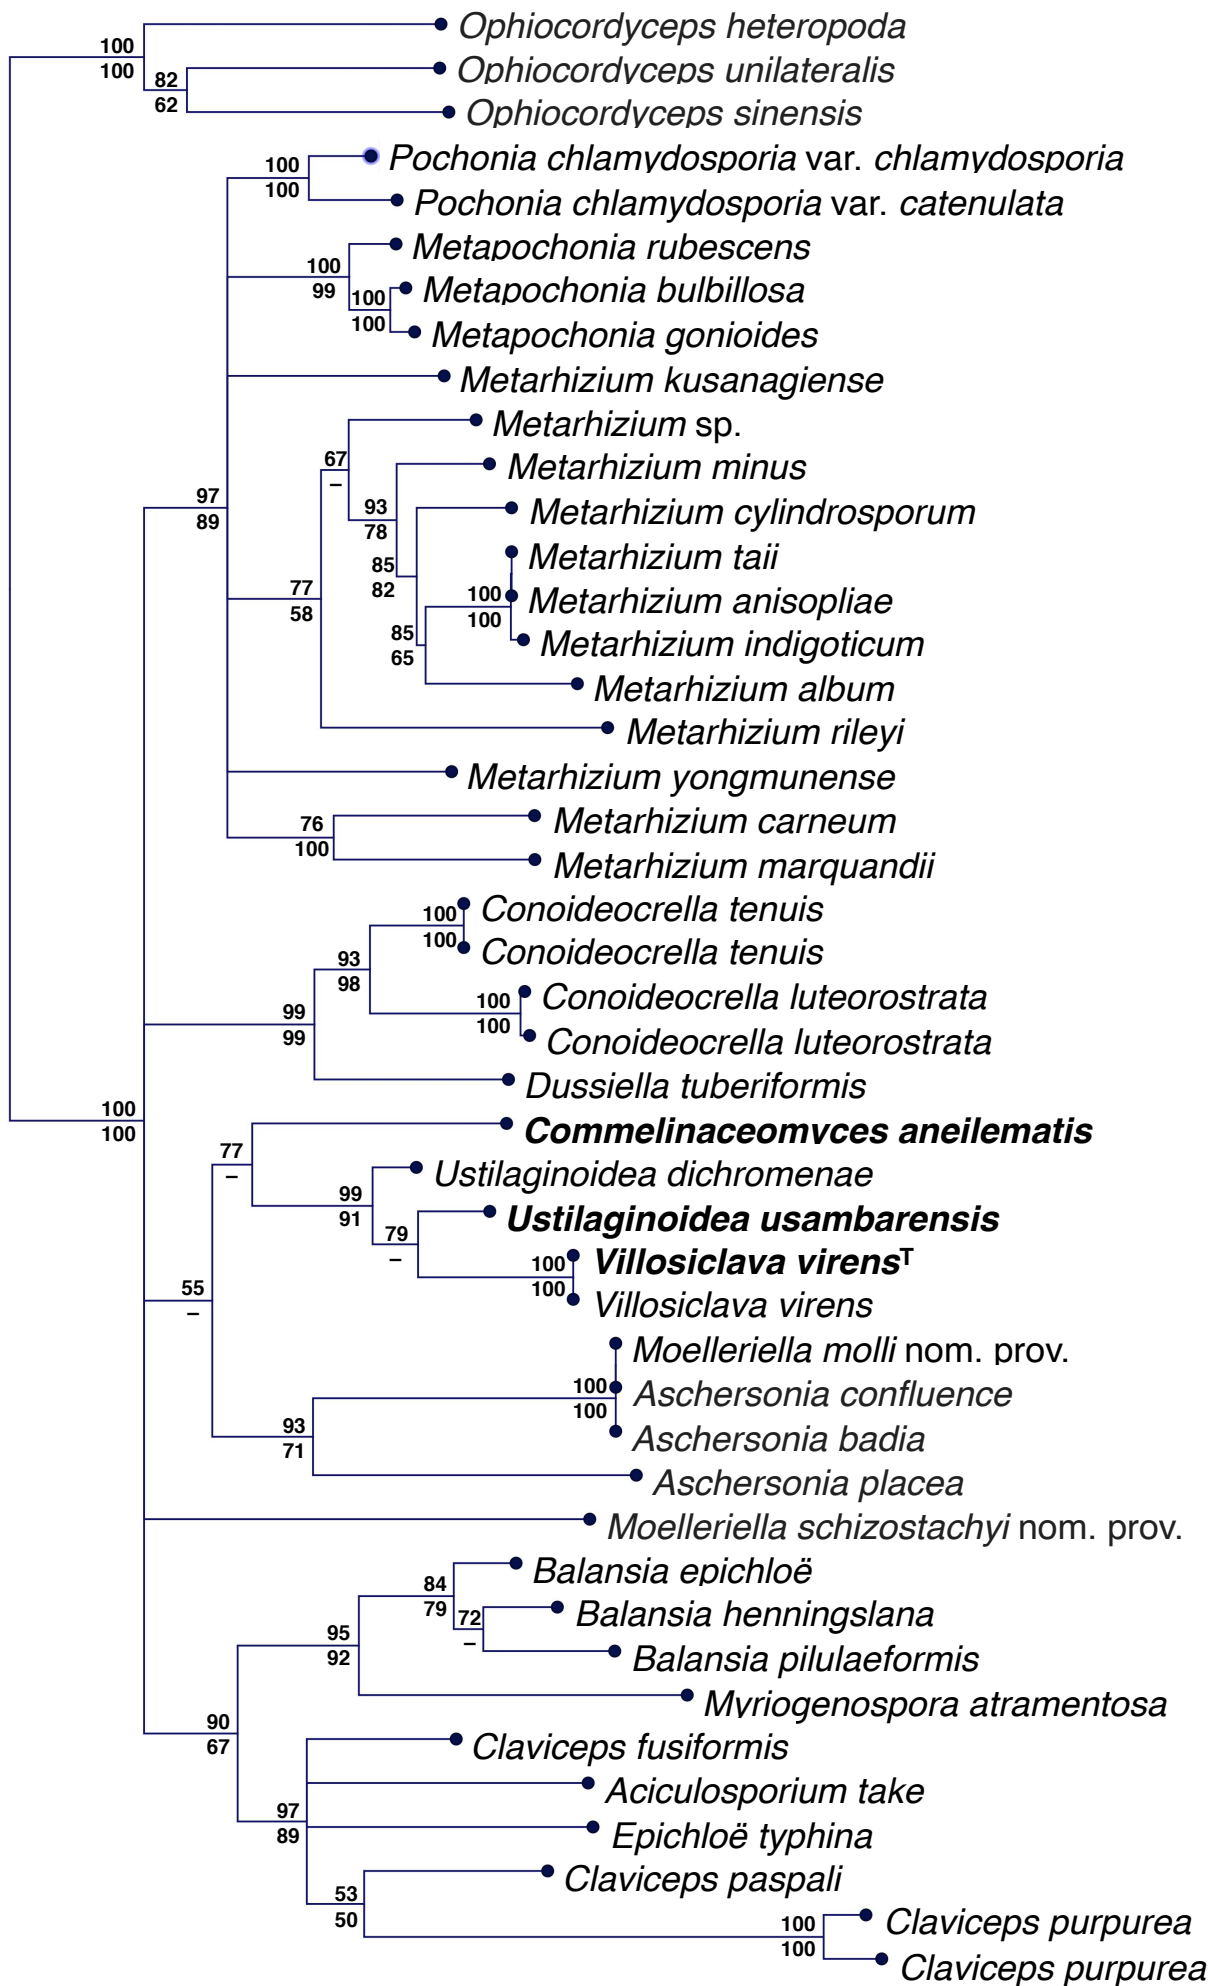

0.020

RPB1

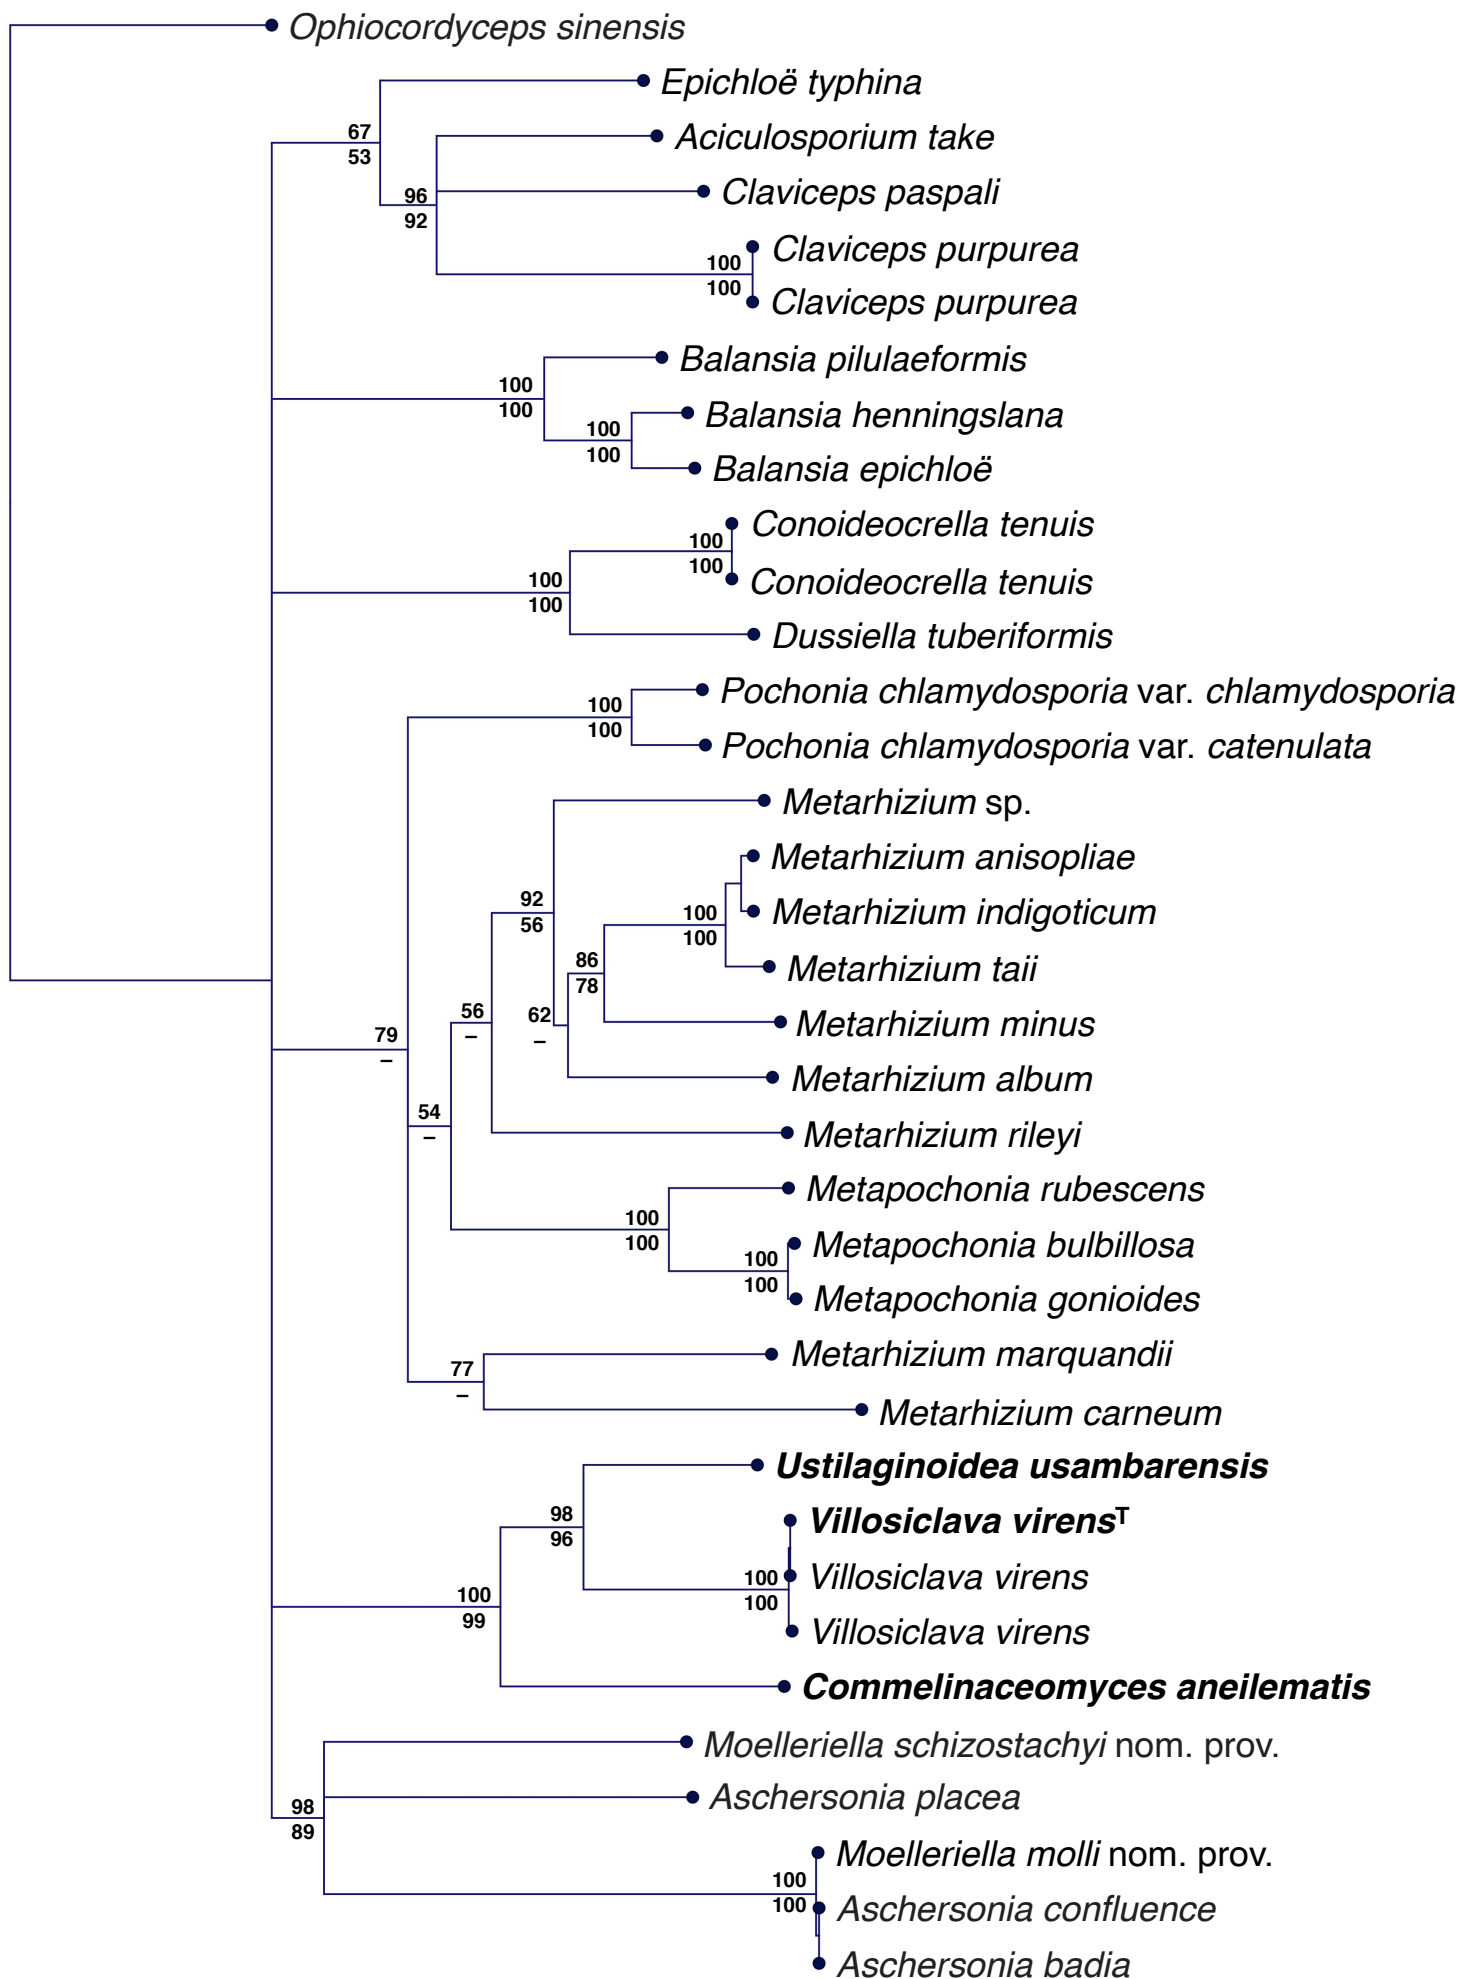

0.018

RPB2

Supplement: Supplementary file 1 [file 1]
